# Supplementary material for: Linking Human Milk Oligosaccharides, Infant Fecal Community Types, and Later Risk To Require Antibiotics
Source: PubMed Central journal article supplement (PMC7078481; doi:10.1128/mbio.03196-19), 2020-03-17

**3m****12m****Faith's phylogenetic diversity index**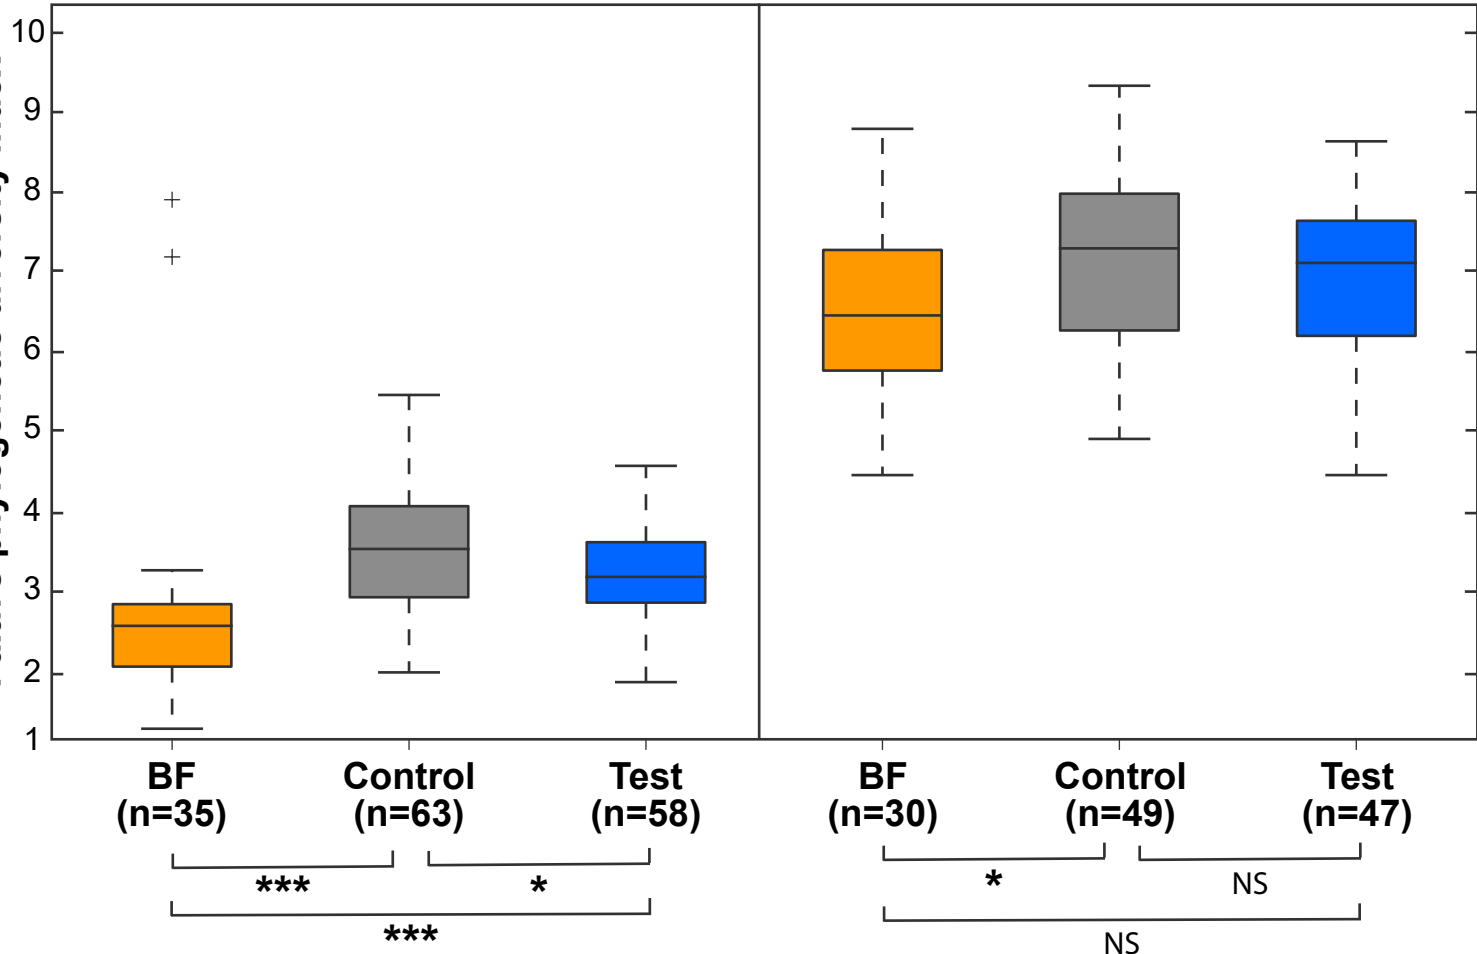

Supplement: mBio.03196-19-sf002.pdf [file mBio.03196-19-sf002.pdf]
