# Supplementary material for: Linking Human Milk Oligosaccharides, Infant Fecal Community Types, and Later Risk To Require Antibiotics
Source: PubMed Central journal article supplement (PMC7078481; doi:10.1128/mbio.03196-19), 2020-03-17
Supplement: mBio.03196-19-st001.pdf [file mBio.03196-19-st001.pdf]

**Supplementary Table 1.** Separation between feeding groups and delivery modes at 3 months assessed by the distribution Bray-Curtis distances at genus level

| Comparison group 1 vs. group 2        | within group 1 |          | within group 2 |          | between groups |          | p-value*              |
|---------------------------------------|----------------|----------|----------------|----------|----------------|----------|-----------------------|
|                                       | average        | variance | average        | variance | average        | variance |                       |
| Test.Vaginal vs. Test.Caesarean       | 0.39           | 0.11     | 0.75           | 0.081    | 0.39           | 0.094    | 0.21                  |
| Control.Vaginal vs. Control.Caesarean | 0.26           | 0.011    | 0.57           | 0.079    | 0.49           | 0.081    | 2.5x10 <sup>-16</sup> |
| BF.Vaginal vs. BF.Caesarean           | 0.5            | 0.15     | 0.61           | 0.19     | 0.55           | 0.18     | 0.12                  |
| Test.Caesarean vs. Control.Caesarean  | 0.39           | 0.081    | 0.57           | 0.079    | 0.51           | 0.09     | 0.31                  |
| Test.Vaginal vs. Control.Vaginal      | 0.39           | 0.11     | 0.26           | 0.011    | 0.33           | 0.063    | 0.11                  |
| BF.Vaginal vs. Test.Vaginal           | 0.5            | 0.15     | 0.39           | 0.11     | 0.45           | 0.13     | 0.076                 |
| BF.Vaginal vs. Control.Vaginal        | 0.5            | 0.15     | 0.26           | 0.011    | 0.41           | 0.088    | 6.4x10 <sup>-8</sup>  |
| BF.Caesarean vs. Test.Caesarean       | 0.61           | 0.19     | 0.39           | 0.081    | 0.53           | 0.14     | 0.016                 |
| BF.Caesarean vs. Control.Caesarean    | 0.61           | 0.19     | 0.57           | 0.079    | 0.64           | 0.11     | 6.4x10 <sup>-5</sup>  |

\*P-value of the Wilcoxon rank test of the hypothesis “within groups distances < between groups distances”
