# Supplementary material for: Linking Human Milk Oligosaccharides, Infant Fecal Community Types, and Later Risk To Require Antibiotics
Source: PubMed Central journal article supplement (PMC7078481; doi:10.1128/mbio.03196-19), 2020-03-17
Supplement: mBio.03196-19-st002.pdf [file mBio.03196-19-st002.pdf]

**Supplementary Table 2.** Differences of taxa abundances at genus level between Control and Test groups at 3 months.

| At 3 months<br>Taxa                        | Statistics (Test/Control) |      | Median  |       |       | Mean    |       |       |
|--------------------------------------------|---------------------------|------|---------|-------|-------|---------|-------|-------|
|                                            | p-value                   | FDR  | Control | Test  | BF    | Control | Test  | BF    |
| <i>Escherichia</i>                         | 0.0078                    | 0.13 | 4.42    | 1.56  | 1.82  | 8.13    | 4.79  | 4.54  |
| <i>Bifidobacterium</i>                     | 0.0093                    | 0.13 | 74.47   | 82.81 | 90.87 | 64.75   | 70.40 | 64.49 |
| <i>Peptostreptococcaceae_g__unassigned</i> | 0.0275                    | 0.16 | 0.31    | 0.18  | 0.00  | 0.44    | 0.26  | 0.03  |
| <i>Streptococcus</i>                       | 0.0372                    | 0.17 | 0.46    | 0.27  | 0.11  | 1.46    | 1.00  | 5.95  |

Values for the BF group are shown as references. Values for Test, Control and BF are medians and means of the relative abundance of the indicated genus (% of all sequences). P-value : Mann-Whitney U tests of the Test and Control groups. FDR : false discovery rate
