# Supplementary material for: Linking Human Milk Oligosaccharides, Infant Fecal Community Types, and Later Risk To Require Antibiotics
Source: PubMed Central journal article supplement (PMC7078481; doi:10.1128/mbio.03196-19), 2020-03-17
Supplement: mBio.03196-19-st003.pdf [file mBio.03196-19-st003.pdf]

**Supplementary Table 3** Differences of abundances for bifidobacterial species between BF, Control and Test groups at 3 months.

| At 3 months                                                                                  | Statistics | Median  |       |      | Mean    |       |       |       |
|----------------------------------------------------------------------------------------------|------------|---------|-------|------|---------|-------|-------|-------|
| Taxa                                                                                         | p-value    | Control | Test  | BF   | Control | Test  | BF    | All   |
| <i>Bifidobacterium_s__adolescentis.S</i>                                                     | 0.24       | 0.01    | 0.01  | 0.00 | 1.54    | 2.86  | 0.22  | 1.73  |
| <i>Bifidobacterium_s__animalis.subsp.lactis.S</i>                                            | 0.55       | 0.00    | 0.00  | 0.00 | 2.06    | 0.02  | 0.00  | 0.84  |
| <i>Bifidobacterium_s__bifidum.S</i>                                                          | 0.79       | 2.42    | 7.57  | 6.01 | 10.29   | 9.44  | 17.47 | 11.58 |
| <i>Bifidobacterium_s__breve.S</i>                                                            | 0.72       | 0.33    | 1.19  | 0.11 | 11.32   | 17.76 | 17.61 | 15.13 |
| <i>Bifidobacterium_s__catenulatum.pseudocatenulatum</i><br><i>angulatum.kashiwanohense.S</i> | 0.6        | 0.03    | 0.05  | 0.03 | 13.19   | 12.23 | 3.98  | 10.77 |
| <i>Bifidobacterium_s__dentium.S</i>                                                          | 0.66       | 0.01    | 0.01  | 0.01 | 1.19    | 1.57  | 0.27  | 1.12  |
| <i>Bifidobacterium_s__longum.subsp.infantis.suis.S</i>                                       | 0.89       | 0.03    | 0.04  | 0.04 | 3.59    | 4.82  | 9.20  | 5.31  |
| <i>Bifidobacterium_s__longum.subsp.longum.S</i>                                              | 0.74       | 3.41    | 11.63 | 2.61 | 19.73   | 19.27 | 13.83 | 18.24 |
| <i>Bifidobacterium_s__scardovi.S</i>                                                         | 0.14       | 0.00    | 0.00  | 0.00 | 0.12    | 0.31  | 0.01  | 0.17  |
| <i>Bifidobacterium_Other</i>                                                                 | 0.22       | 0.64    | 1.70  | 0.33 | 1.34    | 1.50  | 1.39  | 1.41  |

Values for Test, Control and BF are medians and means of the relative abundance of the indicated taxa. P-value : Kruskal-Wallis test of the three groups.
